# Supplementary material for: Clinical Management of Pathogen-Negative Tuberculous Meningitis in Adults: A Series Case Study
Source: MDPI journal article supplement (doi:10.3390/jcm11216250), 2022-10-23
Supplement: s1 [file s1]

**Supplement Table S1.** Details of lumbar puncture time and various index values in CSF for five patients.

|              | WCC<br>(10 <sup>6</sup> /L) | N % | L % | M % | Glu<br>(mmol/<br>L×10 <sup>-2</sup> ) | Blood<br>Glu<br>(mmol/<br>L×10 <sup>-2</sup> ) | CSF/<br>Blood<br>glucose | Lactate<br>(mmol/<br>L×10 <sup>-2</sup> ) | LDH<br>(U/L) | Protein<br>(mg/L) | Cl <sup>-</sup><br>(mmol/L) | IgG<br>(mg/L) | IgM<br>(mg/L) | IgA<br>(mg/L) |
|--------------|-----------------------------|-----|-----|-----|---------------------------------------|------------------------------------------------|--------------------------|-------------------------------------------|--------------|-------------------|-----------------------------|---------------|---------------|---------------|
| <b>Case1</b> |                             |     |     |     |                                       |                                                |                          |                                           |              |                   |                             |               |               |               |
| 05/06        | 350                         | 5   | 90  | 5   | 138                                   | 650                                            | 0.21                     | 472                                       | 36           | 1383              | 107.5                       | 122           | 5.2           | 43.1          |
| 05/14        | 440                         | 0   | 95  | 5   | 189                                   | 580                                            | 0.33                     | 412                                       | 33           | 1265              | 109.8                       | /             | /             | /             |
| 05/25        | 780                         | 8   | 87  | 5   | 139                                   | 540                                            | 0.26                     | 366                                       | 24           | 1232              | 107                         | 151           | 4.3           | 35.8          |
| 06/03        | 400                         | 22  | 74  | 4   | 169                                   | 470                                            | 0.36                     | 402                                       | 24           | 960               | 109.6                       | 131           | 4.6           | 31.5          |
| 06/15        | 190                         | 9   | 87  | 4   | 205                                   | 680                                            | 0.30                     | 360                                       | 21           | 1082              | 113.4                       | 116           | 4.5           | 31.3          |
| 06/28        | 41                          | -   | -   | -   | 225                                   | 760                                            | 0.30                     | 271                                       | 19           | 918               | 121.6                       | 76.9          | 2.7           | 25.8          |
| 08/06        | 20                          | -   | -   | -   | 286                                   | 940                                            | 0.30                     | 172                                       | 19           | 859               | 123.8                       | 71.5          | 1.8           | 21.6          |
| 09/22        | 65                          | 0   | 94  | 6   | 289                                   | 860                                            | 0.34                     | 157                                       | 18           | 768               | 127.3                       | 63            | 1.2           | 13            |
| <b>Case2</b> |                             |     |     |     |                                       |                                                |                          |                                           |              |                   |                             |               |               |               |
| 04/23        | 510                         | 15  | 84  | 1   | 208                                   | 700                                            | 0.30                     | 583                                       | 47           | 1683              | 120                         | 162           | 5             | 13.4          |
| 04/30        | 330                         | 12  | 85  | 3   | 216                                   | 700                                            | 0.31                     | 332                                       | 36           | 1084              | 118.3                       | 104           | 5             | 10.3          |
| 05/07        | 550                         | 10  | 88  | 2   | 261                                   | 920                                            | 0.28                     | 393                                       | 44           | 1399              | 122                         | 205           | 8.7           | 17.9          |
| 05/14        | 160                         | 6   | 91  | 3   | 243                                   | 820                                            | 0.30                     | 373                                       | 22           | 1252              | 121.5                       | 178           | 5.4           | 15.7          |
| 05/21        | 230                         | 2   | 98  | 0   | 283                                   | 1010                                           | 0.28                     | 339                                       | 20           | 1272              | 120.3                       | 160           | 4.3           | 14            |
| 05/28        | 460                         | 11  | 89  | 0   | 242                                   | 1040                                           | 0.12                     | 324                                       | 18           | 1220              | 120.3                       | 181           | 5.8           | 16            |
| 06/04        | 48                          | -   | -   | -   | 232                                   | 930                                            | 0.25                     | 290                                       | 18           | 1107              | 119.4                       | 156           | 3.6           | 11.8          |
| 06/11        | 65                          | 2   | 96  | 2   | 261                                   | 660                                            | 0.40                     | 270                                       | 19           | 1204              | 122.8                       | 163           | 3             | 11            |

|              |     |    |    |   |     |      |      |     |       |      |       |      |      |      |
|--------------|-----|----|----|---|-----|------|------|-----|-------|------|-------|------|------|------|
| 06/30        | 110 | 6  | 89 | 5 | 261 | 780  | 0.33 | 221 | 20    | 1043 | 123.1 | 125  | 2.2  | 9.3  |
| 07/30        | 49  | -  | -  | - | 338 | 740  | 0.46 | 214 | 20    | 859  | 126.3 | 104  | 1.1  | 7.7  |
| <b>Case3</b> |     |    |    |   |     |      |      |     |       |      |       |      |      |      |
| 04/18        | 134 | 10 | 90 | 0 | 196 | 890  | 0.22 | 452 | 49    | 2356 | 112.1 | 178  | 14.4 | 20.7 |
| 04/25        | 160 | 8  | 88 | 4 | 202 | 630  | 0.32 | 359 | 57.00 | 980  | 113.1 | 69   | 5.9  | 6.8  |
| 05/02        | 60  | 6  | 90 | 4 | 239 | 860  | 0.28 | 338 | 25    | 579  | 116.4 | 45.1 | 3.1  | 5.1  |
| 05/27        | 0   | -  | -  | - | 340 | 1110 | 0.31 | 250 | 26    | 388  | 120.6 | 27.9 | 0.8  | 2.4  |
| 10/22        | 0   | -  | -  | - | 347 | 850  | 0.41 | 189 | 24    | 317  | 127.6 | 19.1 | 0.2  | 0.7  |
| <b>Case4</b> |     |    |    |   |     |      |      |     |       |      |       |      |      |      |
| 08/03        | 250 | 40 | 58 | 2 | 151 | 750  | 0.20 | 535 | 113.3 | 1260 | 113.3 | 118  | 4.4  | 24.7 |
| 08/10        | 45  | -  | -  | - | 216 | 770  | 0.28 | 370 | 17    | 919  | 120   | 81   | 5.2  | 17.4 |
| 08/31        | 20  | -  | -  | - | 234 | 830  | 0.28 | 332 | 21    | 1277 | 116.6 | 143  | 8.9  | 27.2 |
| 10/13        | 25  | -  | -  | - | 283 | 970  | 0.29 | 299 | 29    | 911  | 116.7 | 90.2 | 7.6  | 16.8 |
| 02/08        | 4   | -  | -  | - | 337 | 730  | 0.46 | 155 | 10    | 356  | 120.3 | 35   | 0.8  | 6.1  |
| <b>Case5</b> |     |    |    |   |     |      |      |     |       |      |       |      |      |      |
| 07/21        | 125 | 38 | 56 | 6 | 215 | 830  | 0.26 | 352 | 39    | 819  | 114.4 | 106  | 10.4 | 23.8 |
| 07/28        | 160 | 21 | 79 |   | 175 | 910  | 0.19 | 280 | 50    | 900  | 116.9 | /    | /    | /    |
| 08/04        | 300 | 18 | 75 | 6 | 160 | 1290 | 0.12 | 317 | 52    | 823  | 117.1 | /    | /    | /    |
| 08/13        | 120 | 6  | 94 |   | 272 | 1430 | 0.19 | 270 | 38    | 373  | 117.1 | /    | /    | /    |
| 08/23        | 44  | -  | -  | - | 283 | 720  | 0.39 | 223 | 31    | 353  | 117.6 | 49.1 | >60  | 10.6 |
| 10/08        | 1   | -  | -  | - | 317 | 540  | 0.59 | 174 | 30    | 266  | 123.5 | 21.7 | 8.7  | 3.4  |

Legend: WCC—white cells count in the CSF ( $10^6/L$ ); N%—the percentage of Neutrophils; L%—the percentage of lymphocyte; M%—the percentage of monocyte; Glu—Glucose concentration in the CSF ( $mmol/L \times 10^{-2}$ ); Lactate—Lactate concentration in the CSF ( $mmol/L \times 10^{-2}$ ); LDH —Lactate dehydrogenase concentration in the CSF (U/L); Protein—Protein concentration in the CSF (mg/L); Cl—chlorine ions concentration in the CSF (mmol/L); IgG/IgM/IgA—Immunoglobulin G/ Immunoglobulin M/ Immunoglobulin A concentration in the CSF (mg/L); “-” — When the total number of white cells is less than  $50 \times 10^6/L$ , the cells are not classified; “/” — not performed in this patient.

Referential values: WCC:  $0-8 \times 10^6/\text{L}$ ; Glucose:  $222-389 \text{ mmol/L} \times 10^{-2}$ ; Lactate:  $110-240 \text{ mmol/L} \times 10^{-2}$ ; Lactate dehydrogenase:  $<40 \text{ U/L}$ ; Protein:  $150-450 \text{ mg/L}$ ; Cl:  $120-130 \text{ mmol/L}$ ; IgG  $\leq 58.6 \text{ mg/L}$ ; IgM  $\leq 7 \text{ mg/L}$ ; IgA  $\leq 7 \text{ mg/L}$ ;

**Supplement Table S2.** The Lancet consensus scoring system for the five patients

|                                                                                                                                                                                     | Diagnostic score           | Case1 | Case2 | Case3 | Case4 | Case5 |
|-------------------------------------------------------------------------------------------------------------------------------------------------------------------------------------|----------------------------|-------|-------|-------|-------|-------|
| Clinical criteria                                                                                                                                                                   | (Maximum category score=6) | case1 | case2 | case3 | case4 | case5 |
| Symptom duration of more than 5 days                                                                                                                                                | 4                          | 4     | 4     | 4     | 4     | 4     |
| Systemic symptoms suggestive of tuberculosis (one or more of the following): weight loss (or poor weight gain in children), night sweats, or persistent cough for more than 2 weeks | 2                          | 2     | 0     | 0     | 0     | 0     |
| History of recent (within past year) close contact with an individual with pulmonary tuberculosis or a positive TST or IGRA (only in children <10 years of age)                     | 2                          | 0     | 0     | 0     | 0     | 0     |
| Focal neurological deficit (excluding cranial palsies)                                                                                                                              | 1                          | 0     | 0     | 0     | 0     | 1     |
| Cranial nerve palsy                                                                                                                                                                 | 1                          | 1     | 0     | 0     | 0     | 1     |
| Altered consciousness                                                                                                                                                               | 1                          | 1     | 1     | 1     | 0     | 1     |
| CSF criteria                                                                                                                                                                        | (Maximum category score=4) |       |       |       |       |       |
| Clear appearance                                                                                                                                                                    | 1                          | 1     | 1     | 1     | 1     | 1     |
| Cells: 10 – 500 per $\mu$ l                                                                                                                                                         | 1                          | 1     | 1     | 1     | 1     | 1     |
| Lymphocytic predominance (>50%)                                                                                                                                                     | 1                          | 1     | 1     | 1     | 1     | 1     |
| Protein concentration greater than 1 g/L                                                                                                                                            | 1                          | 1     | 1     | 1     | 1     | 0     |
| CSF to plasma glucose ratio of less than 50% or an absolute CSF glucose concentration less than 2.2 mmol/L                                                                          | 1                          | 1     | 1     | 1     | 1     | 0     |
| Cerebral imaging criteria                                                                                                                                                           | (Maximum category score=6) |       |       |       |       |       |
| Hydrocephalus                                                                                                                                                                       | 1                          | 0     | 0     | 0     | 0     | 0     |
| Basal meningeal enhancement                                                                                                                                                         | 2                          | 2     | 0     | 0     | 0     | 0     |
| Tuberculoma                                                                                                                                                                         | 2                          | 2     | 2     | 0     | 2     | 0     |
| Infarct                                                                                                                                                                             | 1                          | 0     | 0     | 0     | 0     | 0     |
| Pre-contrast basal hyperdensity                                                                                                                                                     | 2                          | 0     | 0     | 0     | 0     | 0     |

| Evidence of tuberculosis elsewhere                                                                                                        | (Maximum category score=4 ) |           |           |           |           |   |
|-------------------------------------------------------------------------------------------------------------------------------------------|-----------------------------|-----------|-----------|-----------|-----------|---|
| Chest radiograph suggestive of active tuberculosis signs of tuberculosis = 2; miliary tuberculosis = 4                                    | 4                           | 0         | 0         | 0         | 0         | 0 |
| CT/MRI/Ultrasound evidence for tuberculosis outside the CNS                                                                               | 2                           | 0         | 0         | 0         | 0         | 0 |
| AFB identified or Mycobacterium tuberculosis cultured from another source-i.e., sputum, lymph node, gastric washing, urine, blood culture | 4                           | 0         | 0         | 0         | 0         | 0 |
| Positive commercial M. tuberculosis NAAT from extra-neural specimen                                                                       | 4                           | 0         | 0         | 0         | 0         | 0 |
| Exclusion of alternative diagnoses*                                                                                                       |                             |           |           |           |           |   |
| <b>Total score</b>                                                                                                                        | <b>17</b>                   | <b>12</b> | <b>10</b> | <b>11</b> | <b>10</b> |   |

“\*”—An alternative diagnosis must be confirmed microbiologically (by stain, culture, or NAAT when appropriate), serologically(eg, syphilis), or histopathologically (eg, lymphoma). The list of alternative diagnoses that should be considered, dependent upon age, immune status, and geographical region, include: pyogenic bacterial meningitis, cryptococcal meningitis, syphilitic meningitis, viral meningo-encephalitis, cerebral malaria, parasitic or eosinophilic meningitis (Angiostrongylus cantonesis, Gnathostoma spinigerum, toxocariasis, cysticercosis), cerebral toxoplasmosis and bacterial brain abscess (space-occupying lesionon cerebral imaging)and malignancy (eg, lymphoma)

**Supplement Table S3. The Thwaites'system for the five patients**

|                                     | Diagnostic index | Case1 | Case2 | Case3 | Case4 | Case5 |
|-------------------------------------|------------------|-------|-------|-------|-------|-------|
| Age (years)                         |                  |       |       |       |       |       |
| ≥36                                 | 2                | 2     | 2     | 2     | 2     | 2     |
| <36                                 | 0                |       |       |       |       |       |
| Blood WCC (10 <sup>3</sup> /mL)     |                  |       |       |       |       |       |
| ≥15 000                             | 4                |       |       |       |       |       |
| <15 000                             |                  | 0     | 0     | 0     | 0     | 0     |
| History of illness (days)           |                  |       |       |       |       |       |
| ≥6                                  | -5               | -5    | -5    | -5    | -5    | -5    |
| <6                                  |                  |       |       |       |       |       |
| CSF total WCC (10 <sup>3</sup> /mL) |                  |       |       |       |       |       |
| ≥900                                |                  |       |       |       |       |       |
| <900                                | 0                | 0     | 0     | 0     | 0     | 0     |
| CSF % neutrophils                   |                  |       |       |       |       |       |
| ≥75                                 | 4                |       |       |       |       |       |
| <75                                 | 0                | 0     | 0     | 0     | 0     | 0     |
| yes                                 | ≤4               | -3    | -3    | -3    | -3    | -3    |
| no                                  | >4               |       |       |       |       |       |

Supplement Table S4. Sixteen cases of pathogen-negative Tuberculosis meningitis reported in the literature from 2020 to date

| Tuberculosis cases         | Age(year) | Sex    | Illness history*      | Symptom duration (days)* | Clinical syndrome                                                              | CSF results              |                 |              |                     |          |     |       | Evidence of extracranial tuberculosis                                                              | Brain-MRI                                                      | Treatment                                                                                 | Outcome              |
|----------------------------|-----------|--------|-----------------------|--------------------------|--------------------------------------------------------------------------------|--------------------------|-----------------|--------------|---------------------|----------|-----|-------|----------------------------------------------------------------------------------------------------|----------------------------------------------------------------|-------------------------------------------------------------------------------------------|----------------------|
|                            |           |        |                       |                          |                                                                                | WCC (10 <sup>6</sup> /L) | Protein (mg/dl) | Glu (mmol/L) | <i>M.tb</i> culture | ZN smear | PCR | Xpert |                                                                                                    |                                                                |                                                                                           |                      |
| Flynn, W. P. et al.* [1]   | 30        | Male   | No                    | > 30                     | Weight loss; Headache; Fever; Confused; Lost the ability to speak English      | 18000                    | 672             | 0.8          | +                   | -        | -   | /     | No evidence find in Chest-CT/ Abdomen-CT/ Pelvis-CT                                                | Clival osteitis; Communicating Hydrocephalu                    | 0.3g Isoniazid; 0.6g Rifampin; 1g Levofloxacin; 2g Pyrazinamide; Dexamethasone; Linezolid | Complete improvement |
| Vasconcelos, G. et al. [2] | 47        | Female | No                    | > 60                     | Vomiting episode; Asthenia; Weight loss; Disorientation; Psychomotor agitation | 120                      | 128             | 2            | -                   | -        | -   | /     | Miliary tuberculosis                                                                               | Numerous contrast-enhanced lesions; Leptomeningeal enhancement | Isoniazid; Rifampin; Pyrazinamide; Ethambutol; Dexamethasone                              | Complete improvement |
| Tala-Ighil, T. et al. [3]  | 48        | Male   | Hypertension;Diabetes | 5                        | Weight loss; Central facial paralysis; Dysarthria; Left hemiplegia             | 5                        | 105             | /            | -                   | -        | -   | /     | Miliary tuberculosis                                                                               | Acute infarction of internal capsule                           | Isoniazid; Rifampin; Pyrazinamide; Ethambutol; Prednisone                                 | Partial recovery     |
| Esposito, S. B. et al. [4] | 30        | Male   | No                    | > 14                     | Weight loss; Vomiting; Headache; Fever                                         | /                        | 351             | 0.7          | -                   | -        | -   | /     | Miliary tuberculosis; Multiple ring-enhancing foci in spine;sacral osteomyelitis;septic arthritis; | Multiple ring-enhancing lesions                                | Isoniazid; Rifampicin; Pyrazinamide; Ethambutol; Pyridoxine; Dexamethasone                | /                    |

| paraspinous abscess        |    |        |                       |     |                                                                                                                      |     |       |      |   |   |   |   |                                                                             |                                                                                                          |                                                                                                            |                      |  |
|----------------------------|----|--------|-----------------------|-----|----------------------------------------------------------------------------------------------------------------------|-----|-------|------|---|---|---|---|-----------------------------------------------------------------------------|----------------------------------------------------------------------------------------------------------|------------------------------------------------------------------------------------------------------------|----------------------|--|
| Chesdachai, S. et al.* [5] | 34 | Female | Hypertension;Diabetes | 14  | Headache; Fever; Diplopia; Blurred vision; Confused                                                                  | 955 | 179   | 1.8  | + | - | + | - | No evidence find in Chest x-ray                                             | Leptomeningeal enhancement; Acute cerebral infarction; Communicating hydrocephalu                        | Isoniazid; Rifampin; Pyrazinamide; Ethambutol                                                              | Partial recovery     |  |
| Shao, Kai. et al. [6]      | 46 | Male   | Hypertension          | >30 | Headache; Fever; Anorexia; Asthenia; One-and-a-half syndrome; Right peripheral facial nerve palsy; Horner’s syndrome | 756 | 81.92 | 2.81 | - | - | - | / | No evidence find in Chest-CT                                                | Numerous contrast-enhancement in the medulla oblongata, pons, and leptomeninge                           | 0.4g Isoniazid<br>0.45g Rifampin<br>10mg Dexamethasone                                                     | Complete improvement |  |
| Zafar, Z. et al. [7]       | 24 | Male   | No                    | >30 | Headache; Fever; Confused; A solitary seizure; Paralysis of both lower limbs; Dysuria                                | /   | 298   | 1.16 | - | - | - | - | Enhanced nodules and ring lesions extending from thoracic segment T2 to T9. | Basal meningeal enhancement                                                                              | 0.75g Isoniazid;<br>0.15g Rifampicin;<br>0.4g Pyrazinamide;<br>0.275g Ethambutol;<br>10mg Dexamethasone    | Partial recovery     |  |
| Kitazaki, Yuki. et al. [8] | 70 | Female | No                    | <10 | Cough; Fever; Impaired consciousness; Right-sided hemiparesis, Conjugate eye deviation to the right                  | 760 | 273   | 0.72 | - | - | - | - | /                                                                           | Diffuse thickness of the leptomeninges; Nodular lesions with gadolinium enhancement around the brainstem | 0.3g Isoniazid;<br>0.45g Rifampicin;<br>1.2g Pyrazina-<br>mide;<br>0.75g Ethambutol;<br>32mg Dexamethasone | Died                 |  |



|                                     |    |        |                                                                        |     |                                                                                                                                                   |     |       |      |   |   |   |   |                                                              |                                                                                                                             |                                                                           |                         |
|-------------------------------------|----|--------|------------------------------------------------------------------------|-----|---------------------------------------------------------------------------------------------------------------------------------------------------|-----|-------|------|---|---|---|---|--------------------------------------------------------------|-----------------------------------------------------------------------------------------------------------------------------|---------------------------------------------------------------------------|-------------------------|
| <b>Oka, Y. et al. [9]</b>           | 61 | Female | chronic renal failure                                                  | 7   | Fatigue;<br>Fever;<br>Deteriorated;<br>Nonconvulsive<br>Status<br>Epilepticus                                                                     | 225 | 405.7 | 0.56 | - | - | + | - | No evidence find in<br>Chest-CT                              | Transient diffusion<br>restriction                                                                                          | Isoniazid;<br>Rifampicin;<br>Ethambutol                                   | Partial<br>recovery     |
| <b>Elavarasi, A. et al. [10]</b>    | 26 | Female | No                                                                     | >60 | Headache;<br>Fever                                                                                                                                | 540 | 260   | 0.83 | - | - | - | - | No evidence find in<br>Chest-X-ray                           | Multiple enhancing<br>lesions in brain stem                                                                                 | Isoniazid;<br>Rifampicin;<br>Pyrazinamide;<br>Ethambutol                  | Complete<br>improvement |
| <b>Gaba, S. et al.[11]</b>          | 20 | Female | No                                                                     | 14  | Anorexia;<br>Headache;<br>Fever                                                                                                                   | 194 | 160   | 2.44 | - | - | + | - | No evidence find in<br>Chest-X-ray                           | Focal temporal<br>cerebritis with<br>meningitis; Cerebellar<br>granulomas; Basal<br>exudates                                | Isoniazid;<br>Rifampicin;<br>Pyrazinamide;<br>Ethambutol                  | Partial<br>recovery     |
| <b>Siahaan, A. M. P. et al.[12]</b> | 38 | Male   | No                                                                     | 14  | Headache;<br>Fever;<br>Cough;<br>Weight loss;<br>Right<br>Hemiparesis;<br>Paroxysmal<br>sympathetic<br>hyperactivity;<br>Loss of<br>consciousness | /   | 320   | 2.89 | - | - | - | / | Pulmonary<br>tuberculosis                                    | Basal cistern<br>enhancement; Rim<br>enhancement mass on<br>the quadrigeminal<br>cistern;<br>Communicating<br>hydrocephalus | Rifampicin;<br>Isoniazid;<br>Pyrazinamide;<br>Ethambutol;<br>Streptomycin | Partial<br>recovery     |
| <b>Desai, N. et al. [13]</b>        | 53 | Female | vulvar squamous cell<br>carcinoma,<br>hypertension, type 2<br>diabetes | 21  | Headache;<br>Fatigue;<br>Diplopia;<br>Slurred speech;<br>Mild confusion                                                                           | 72  | 142   | 5.5  | - | - | - | / | No evidence find in<br>Chest-CT                              | Multiple ring-<br>enhancing lesions                                                                                         | Rifampin;<br>Isoniazid;<br>Pyrazinamide;<br>Ethambutol;<br>Dexamethasone  | Complete<br>improvement |
| <b>Bongomin, F. et al. [14]</b>     | 20 | Male   | No                                                                     | 14  | Headache;<br>Fever;<br>Bilateral sixth<br>cranial nerve<br>palsy;<br>Urinary<br>retention;<br>Horner's<br>syndrome                                | 80  | /     | 6.4  | - | - | / | + | No evidence find in<br>Chest-CT                              | Diffuse sulcal<br>effacement with<br>predominant basal<br>contrast meningeal<br>enhancement                                 | Rifampicin;<br>Isoniazid;<br>Pyrazinamide;<br>Ethambutol;<br>Pyridoxine   | Complete<br>improvement |
| <b>Arif, S. et al. [15]</b>         | 65 | Male   | Hypertension                                                           | 60  | Anorexia;<br>Weight loss;<br>Headache;                                                                                                            | 250 | 135   | 1.78 | - | - | + | / | No evidence find in<br>Chest-CT/<br>Abdomen-CT/<br>Pelvis-CT | Extensive ring<br>enhancement lesions                                                                                       | Isoniazid;<br>Rifampicin;<br>Ethambutol;<br>Pyrazinamide;                 | Complete<br>improvement |

|                      |    |        |    |    |                                               |     |        |      |   |   |   |   | Fever;<br>Disorientation     |                                                                                                                 |                                                                                            |                  |  |  |  |  |  |  |  |  |  |  | Dexamethasone;<br>Moxifloxacin |
|----------------------|----|--------|----|----|-----------------------------------------------|-----|--------|------|---|---|---|---|------------------------------|-----------------------------------------------------------------------------------------------------------------|--------------------------------------------------------------------------------------------|------------------|--|--|--|--|--|--|--|--|--|--|--------------------------------|
| Kaur, H. et al. [16] | 28 | Female | No | 36 | Weight loss;<br>Drowsy;<br>Headache;<br>Fever | 120 | 1332.8 | 2.16 | - | - | / | - | No evidence find in Chest-CT | Leptomeningeal enhancement;<br>Conglomerate ring enhancing lesions in the extramedullary intradural compartment | Isoniazid;<br>Rifampicin;<br>Pyrazinamide;<br>Ethambutol;<br>Streptomycin;<br>Prednisolone | Partial recovery |  |  |  |  |  |  |  |  |  |  |                                |
|                      |    |        |    |    |                                               |     |        |      |   |   |   |   |                              |                                                                                                                 |                                                                                            |                  |  |  |  |  |  |  |  |  |  |  |                                |

Legend: Illness history\*—diabetes, hepatitis B, AIDS, syphilis, Immune-mediated rheumatic disease, organ transplantation; Syndrome duration\*—the time from symptoms onset to admission;  
 Flynn, W. P. et al.\*—*M.tb* was isolated in the CSF taken from lumbar puncture on admission after 35 days of incubation;  
 Chesdachai, S. et al.\*— On hospital day 17, The patient was empirically started. On hospital day 24, *M.tb* PCR positive. On hospital day 27, *M.tb* culture from the second LP (hospital day 9) positive;

## References

1. Flynn, W. P.; Ntuli, Y.; Zhang, H.; Tiberi, S. A case of Clival Tuberculosis and associated meningitis. *J Clin Tuberc Other Mycobact Dis* **2021**, *25*, 100273.
2. Vasconcelos, G.; Santos, L.; Couto, C.; Cruz, M.; Castro, A. Miliary Brain Tuberculomas and Meningitis: Tuberculosis Beyond the Lungs. *Eur J Case Rep Intern Med* **2020**, *7*, 001931.
3. Tala-Ighil, T.; Greffe, S.; Trad, S.; Delaroche, M.; Coutte, L.; Rouveix, E.; Kahn, J. E.; Hanslik, T. [Cerebral infarction and tuberculosis: case report and literature review]. *Rev Med Interne* **2020**, *41*, 704-707.
4. Esposito, S. B.; Levi, J.; Matuzsan, Z. M.; Amaducci, A. M.; Richardson, D. M. A Case Report of Widely Disseminated Tuberculosis in Immunocompetent Adult Male. *Clin Pract Cases Emerg Med* **2020**, *4*, 375-379.
5. Chesdachai, S.; Katz, B.; Sapkota, S. Diagnostic Challenges and Dilemmas in Tuberculous Meningitis. **2020**, *359*, 6.
6. Shao, K.; Dong, F.; Guo, S.; Wang, J.; Sun, Z. Eight-and-a-half syndrome caused by tuberculous meningitis: a case report. *Acta Neurologica Belgica* **2021**, *121*, 591-593.
7. Zafar, Z.; Hafeez, M. A.-O.; Butt, M. Elusive tuberculous meningitis with rare neurological complication of longitudinally extensive transverse myelitis: a case report. *Spinal Cord Ser. cases* **2021**, *14*, 82.
8. Kitazaki, Y.; Ikawa, M.; Enomoto, S.; Shirafuji, N.; Hayashi, K.; Yamamura, O.; Yamada, S.; Arishima, H.; Noriki, S.; Nakamoto, Y.; et al. An autopsy case of tuberculous meningitis undiagnosed by nested-PCR of CSF samples and brain biopsy. *Journal of the Neurological Sciences* **2020**, *415*, 116968.
9. Oka, Y.; Tabu, H.; Matsumoto, S. Tuberculous meningitis presenting with nonconvulsive status epilepticus and transient diffusion restriction: A rare case. *Neurol India*. **2020**, *68*, 512.
10. Elavarasi, A.; Goyal, V. Brainstem tuberculoma: A delayed IRIS. *Indian J Tuberc* **2020**, *67*, 343-345.
11. Gaba, S.; Gupta, M.; Lamba, A. S.; Bhardwaj, A.; Gupta, H. Bilateral Complete Oculomotor Palsy in Tubercular Meningitis. *Cureus*. **2020**, *12*, 11001.
12. Siahaan, A. M. P.; Tandean, S.; Indharty, R. S.; Nainggolan, B. W. M.; Susanto, M. Paroxysmal sympathetic hyperactivity syndrome in tuberculous meningitis with paradoxical reaction. *Int J Surg Case Rep* **2022**, *99*, 107619.
13. Desai, N.; Krishnan, R.; Rukmangadachar, L. Central Nervous System Tuberculosis Presenting With Multiple Ring-Enhancing Lesions: A Diagnostic Challenge. *Cureus*. **2022**, *14*, 21819.
14. Bongomin, F.; Khan, S. A.; Oravec, T. A Complete Triad: Horner's Syndrome in Tuberculous Meningitis. *Am J Med Sci* **2020**, *360*, 204-205.
15. Arif, S.; Arif, S.; Slehra, A. U.; Yousaf, G.; Nawaz, K. H., Sr. Central Nervous System Tuberculosis With Shower Like Pattern of Intracranial Tuberculomas in an Immunocompetent Patient. *Cureus*. **2020**, *12*, 9922.
16. Kaur, H.; Mittal, G. K.; Singhdev, J. Intradural extramedullary tuberculoma of the spinal cord in patient of tubercular meningitis - an uncommon scenario. *Indian J Tuberc* **2020**, *67*, 426-429.
